# Supplementary material for: The composition and turnover of the Arabidopsis thaliana 80S cytosolic ribosome
Source: Oxford University Press journal article supplement (doi:10.1042/bcj20200385), 2020-08-03
Supplement: bcj-2020-0385_supp.pdf [file bcj-2020-0385_supp.pdf]

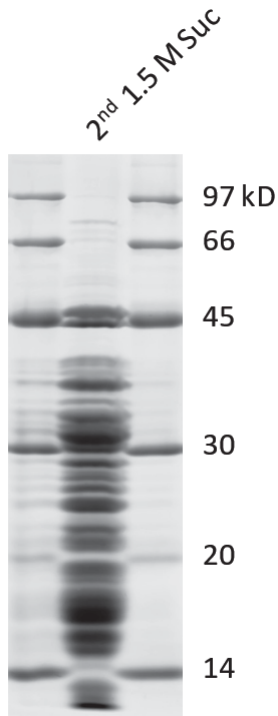

**Supplemental Figure 1: Gel-based separation of purified *Arabidopsis* ribosome proteins.** Coomassie blue stained ribosomes proteins on a SDS-PAGE separation after the second 1.5 M sucrose centrifugation as outlined in Methods. Low molecular weight protein markers are shown for sizing.

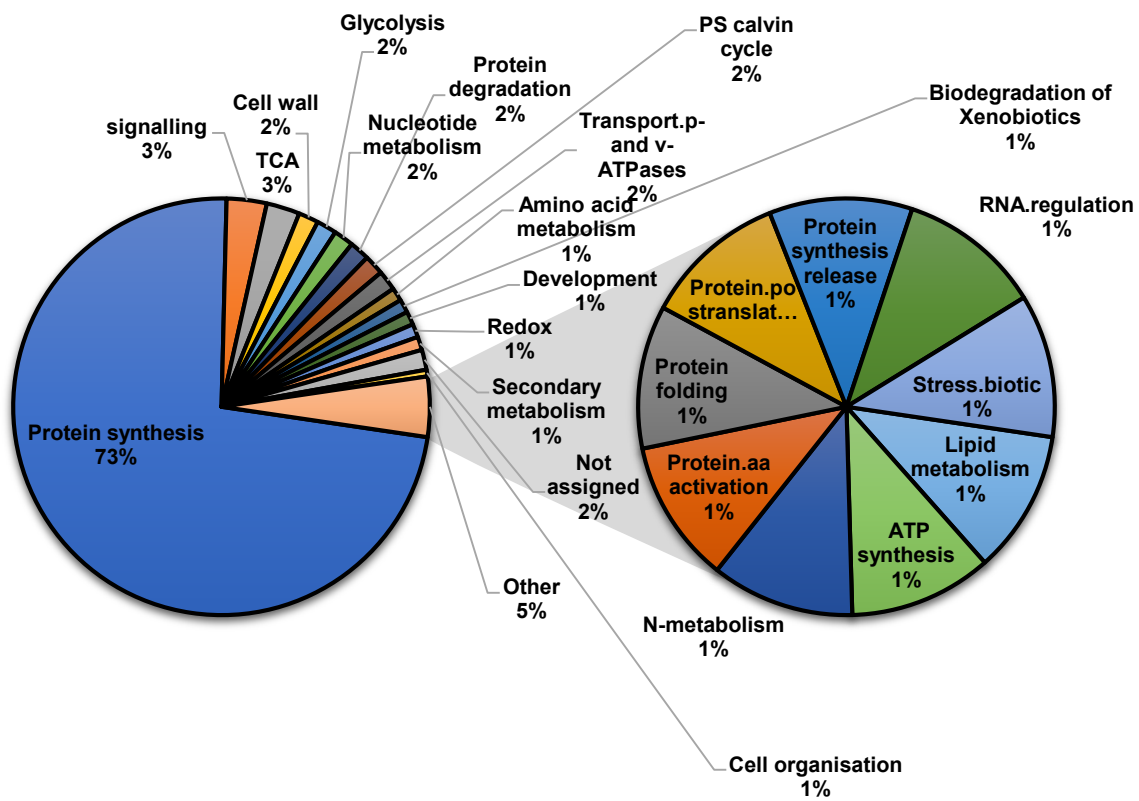

**Supplemental Figure 2: Functional categorisation of all proteins in cluster 6.** Protein functional categories (MapMan) were assigned to the 193 proteins of cluster 6. 73% of the proteins (141 proteins) in cluster 6 are annotated as directly participating in protein synthesis while others are associated with preparations for protein synthesis and protein modification.

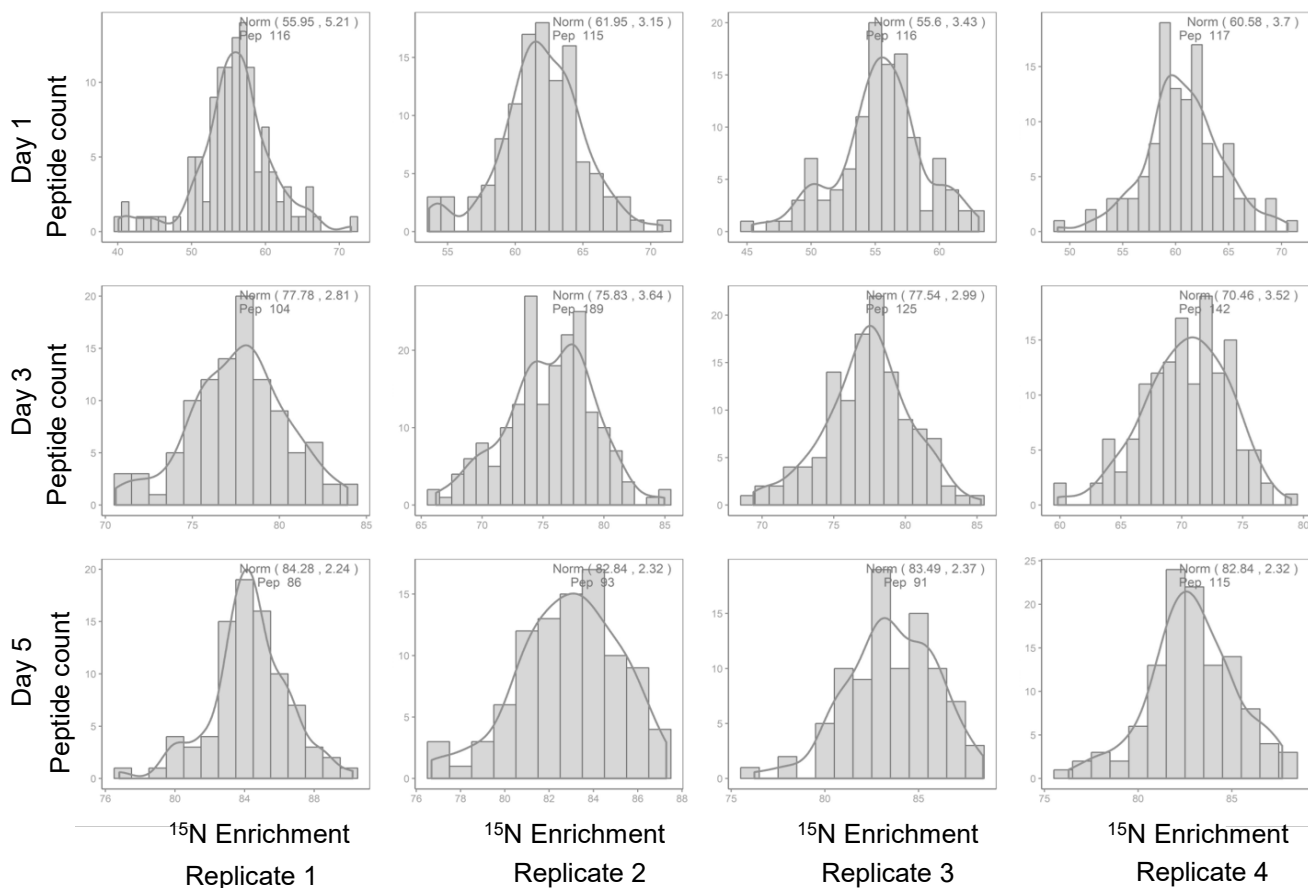

**Supplemental Figure 3.  $^{15}\text{N}$  enrichment in r-protein peptides after different periods of time following transfer to  $^{15}\text{N}$  media.** The grey bars are the actual peptide data, the median and standard deviation (x, y) and the number of peptides (pep) included in each analysis is shown. The plotted line is a normal distribution (norm) .

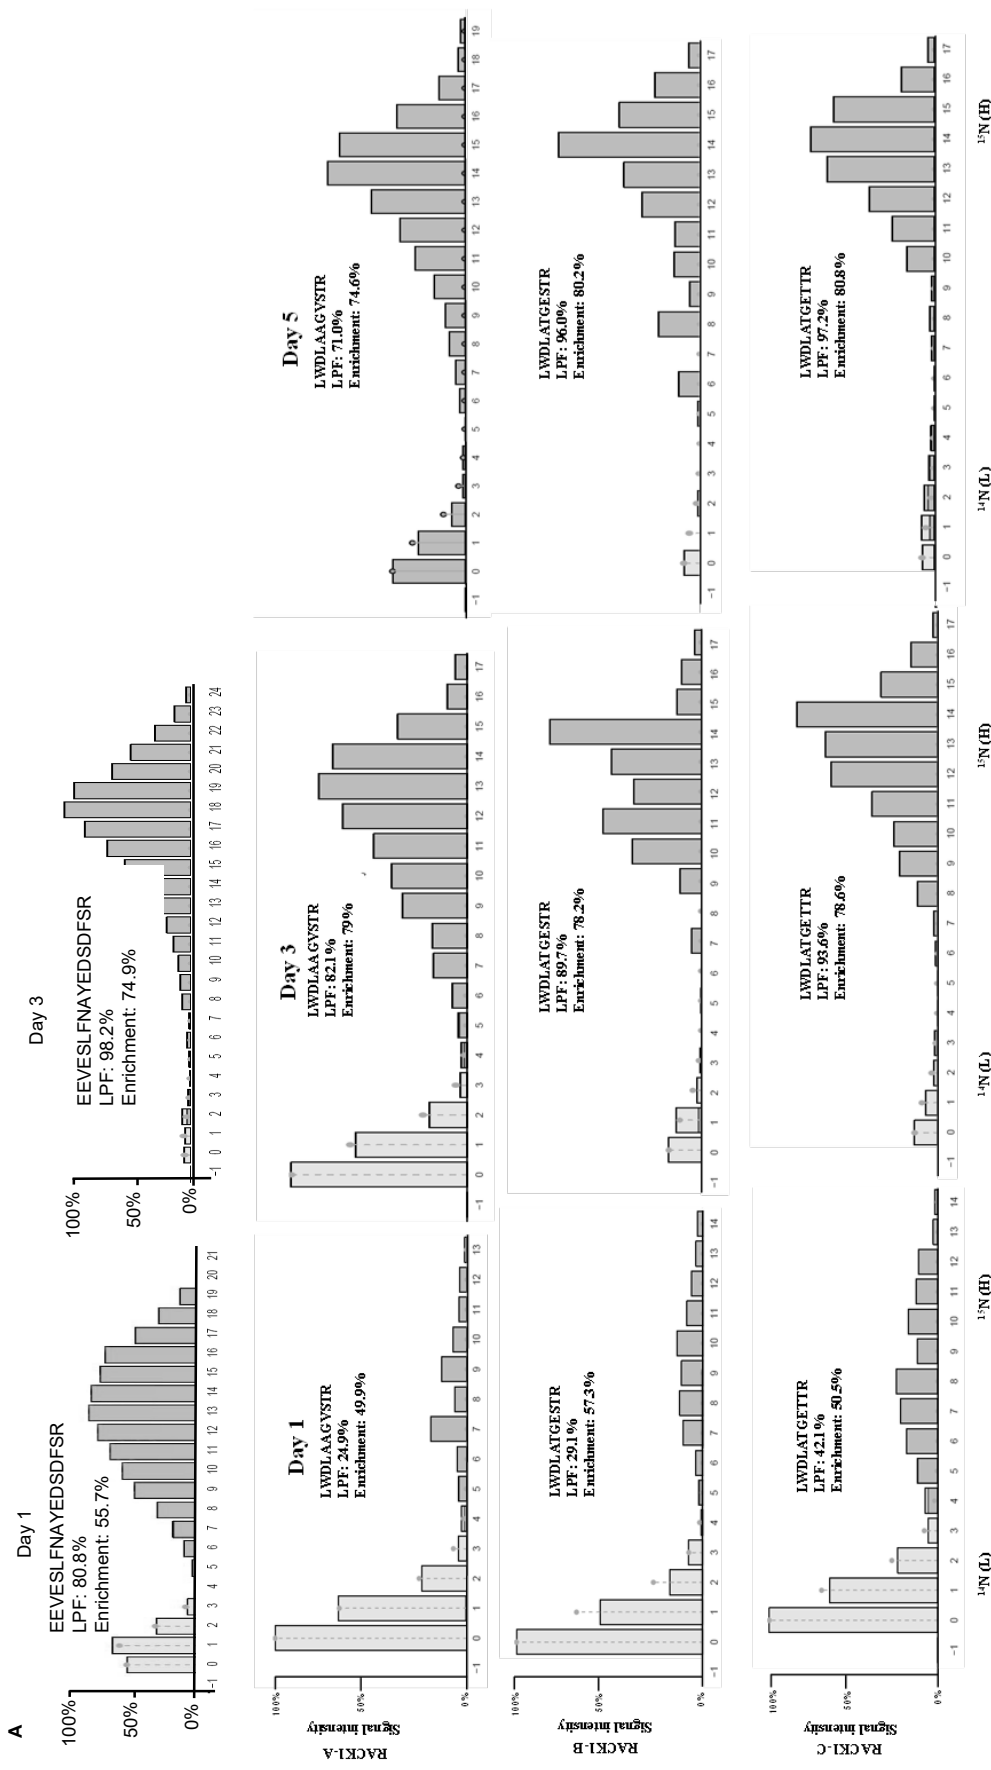

**Supplemental Figure 4: Examples of histograms of the proportion of natural abundance (light grey) and  $^{15}\text{N}$  labelled (dark grey) peptides used to calculate the labelled protein fraction (LPF) for Mrt4/RPOD and RACK1A,B and C. (A) Labelling of RPOD specific peptide EEVESLFNAYEDSDFSR at Day 1 and Day 3. (B) Labelling of specific peptides for RACK1A, B and C at Day 1,3 and 5.**

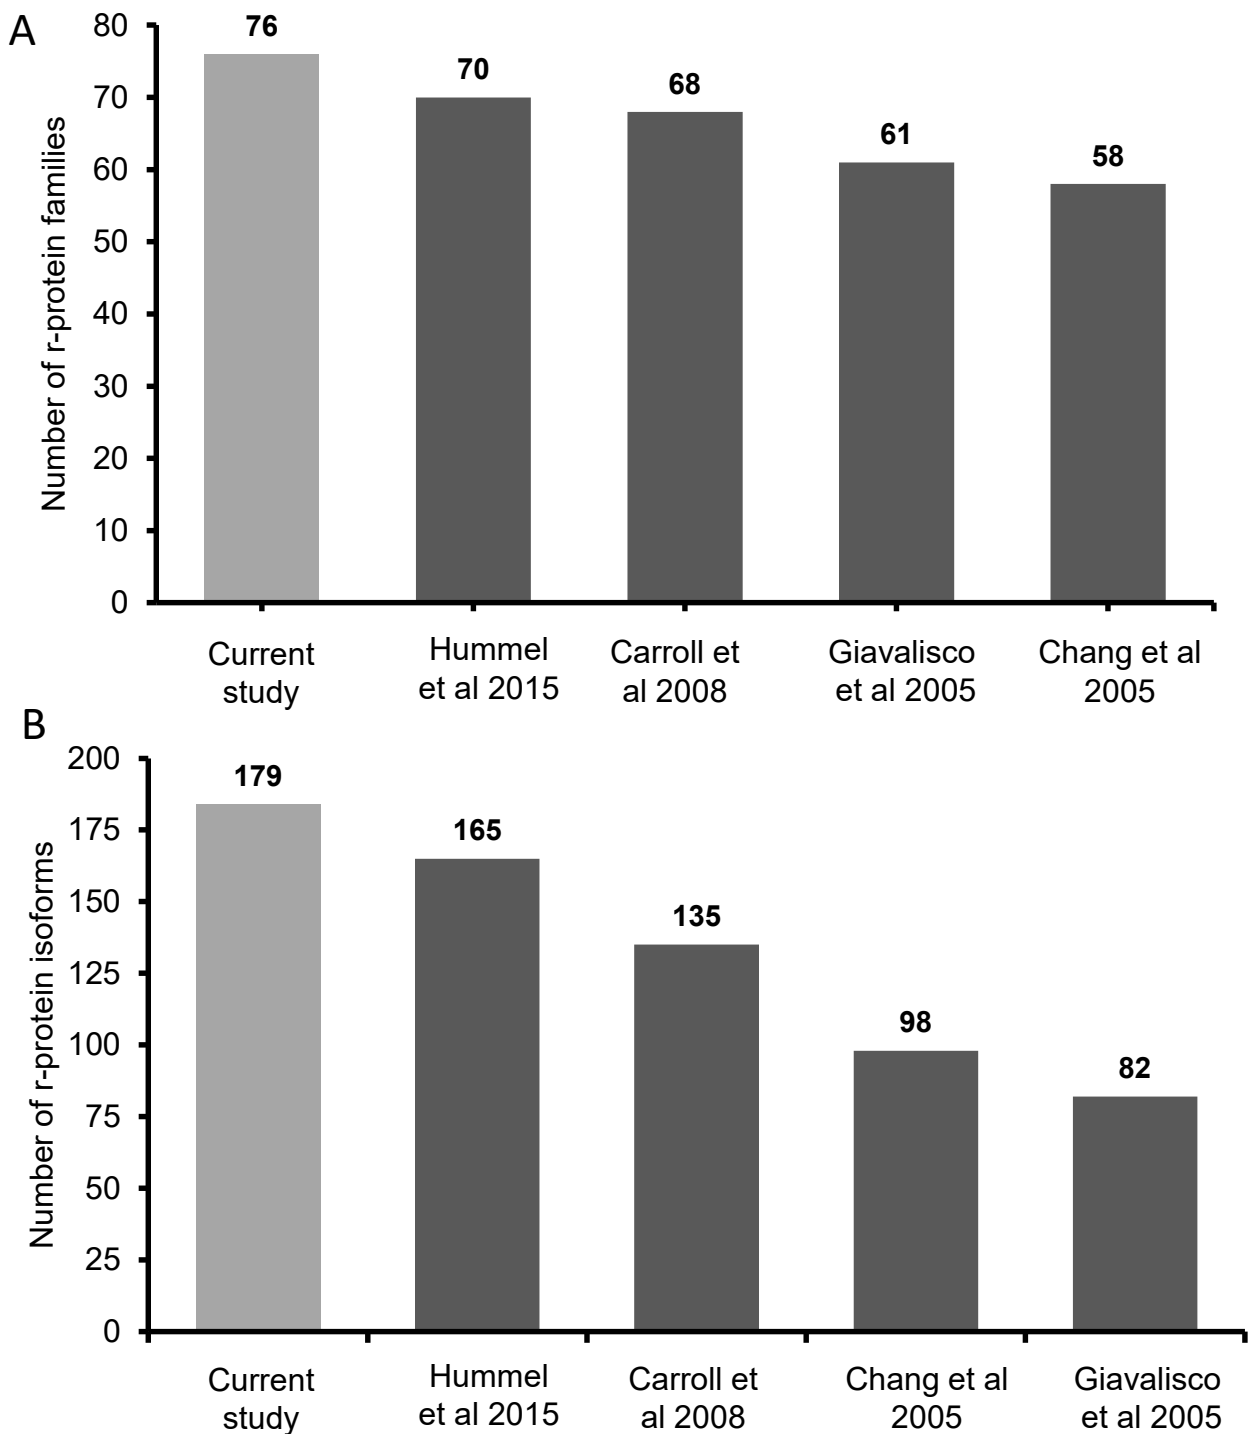

**Supplemental Figure 5: Comparison of number of r-protein families and r-protein isoforms found in this study (light grey) with those in previously published reports (dark grey).** (A) Number of r-protein families that has been identified in comparison with findings of other published reports. (B) Comparison of the number of r-protein isoforms identified in any of the analyses in the current study compared to previously published reports.

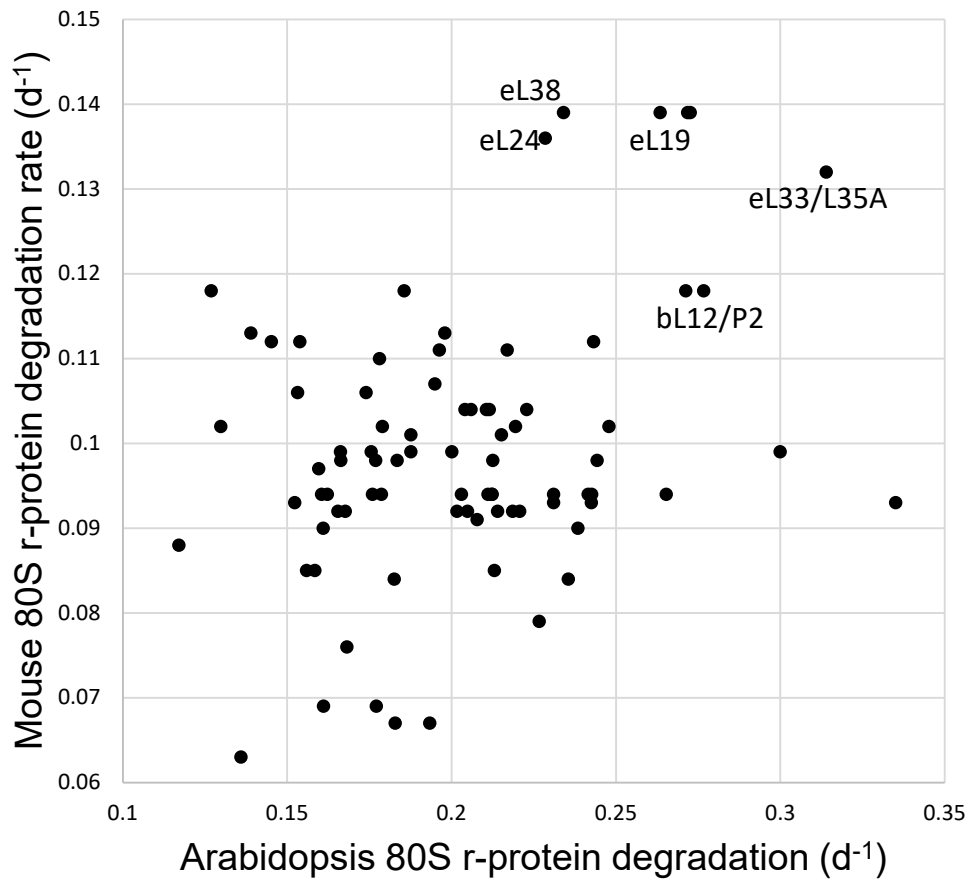

**Supplemental Figure 6. Comparison of r-protein degradation rates in mouse and Arabidopsis.** Degradation rate of mouse r-proteins were obtained from mouse<sup>32</sup> and Arabidopsis (Supplemental Table 4). Homologous r-proteins were paired based on the linkage between mouse and Arabidopsis r-protein families shown in Supplemental Table 4 and their degradation rates plotted orthogonally. R-proteins with consistently high degradation rate are named with the short names shown in Supplemental table 4.
